# Supplementary material for: An improved method for detecting circulating microRNAs with S-Poly(T) Plus real-time PCR
Source: PubMed Central journal article supplement (PMC4602224; doi:10.1038/srep15100), 2015-10-13
Supplement: srep15100-s1.pdf [file srep15100-s1.pdf]

An improved method for detecting circulating microRNAs with S-Poly(T) Plus real-time PCR

Yanqin Niu<sup>1,2\*</sup>, Limin Zhang<sup>1\*</sup>, Huiling Qiu<sup>1,2\*</sup>, Yike Wu<sup>1</sup>, Zhiwei Wang<sup>3</sup>, Yujia Zai<sup>3</sup>, Lin Liu<sup>4</sup>, Junle Qu<sup>2</sup>, Kang Kang<sup>5#</sup>, Deming Gou<sup>1#</sup>

Supplemental file 1 Primers and probe sequences for S-Poly(T) Plus method.

| miRNA                         | Sequence (5'-3')        | Forward primer         | RT primer                                            |
|-------------------------------|-------------------------|------------------------|------------------------------------------------------|
| >hsa-miR-150-5p MIMAT0000451  | UCUCCCAACCCUUGUACCAGUG  | CCGGGTCTCCCAACCCTTGTA  | GTGCAGGGTCCGAGGTCAGAGCCACCTGGGCAATTTTTTTTTTCACTGG    |
| >hsa-miR-23b-3p MIMAT0000418  | AUCACAUUGCCAGGGAUUACC   | TCGGATCACATTGCCAGGG    | GTGCAGGGTCCGAGGTCAGAGCCACCTGGGCAATTTTTTTTTTTGGTAAT   |
| >hsa-miR-130a-3p MIMAT0000425 | CAGUGCAAUGUUAAAAGGGCAU  | GTCGGCAGTGCAATGTAAAA   | GTGCAGGGTCCGAGGTCAGAGCCACCTGGGCAATTTTTTTTTTTATGCC    |
| >hsa-miR-191-5p MIMAT0000440  | CAACGGAAUCCAAAAAGCAGCUG | CCGGGCAACGGAATCCAAAAAG | GTGCAGGGTCCGAGGTCAGAGCCACCTGGGCAATTTTTTTTTTTTCACTG   |
| >hsa-miR-30b-5p MIMAT0000420  | UGUAAAACAUCCUACACUCAGCU | TTCGGTGTAAACATCCTACAC  | GTGCAGGGTCCGAGGTCAGAGCCACCTGGGCAATTTTTTTTTTTTAGCTGA  |
| >hsa-miR-133b MIMAT0000770    | UUUGGUCCCCUUAACCAGCUA   | TCGGTTGGTCCCCTTCAAC    | GTGCAGGGTCCGAGGTCAGAGCCACCTGGGCAATTTTTTTTTTTTAGCTGG  |
| >hsa-miR-208b-3p MIMAT0004960 | AUAAGACGAACAAAAGGUUUGU  | CCGGGATAAGACGAACAAAAG  | GTGCAGGGTCCGAGGTCAGAGCCACCTGGGCAATTTTTTTTTTTTACAAAC  |
| >hsa-miR-1 MIMAT0000416       | UGGAAUGUAAAGAAGUAUGUAU  | CCGGGTGGAATGTAAAGAAGT  | GTGCAGGGTCCGAGGTCAGAGCCACCTGGGCAATTTTTTTTTTTTATACAT  |
| >hsa-miR-26a-5p MIMAT0000082  | UUCAAGUAAUCCAGGAUAGGCU  | CCGGGTTCAGTAATCCAGGA   | GTGCAGGGTCCGAGGTCAGAGCCACCTGGGCAATTTTTTTTTTTTAGCCTA  |
| >hsa-miR-29c-3p MIMAT0000681  | UAGCACAUUGAAAUCGUAUA    | CCGGGTAGCACCATTGAAAT   | GTGCAGGGTCCGAGGTCAGAGCCACCTGGGCAATTTTTTTTTTTTAAACGA  |
| >hsa-miR-34b-3p MIMAT0004676  | CAAUCACUAAUCCACUGCCAU   | CCGGGCAATCACTAACTCCAC  | GTGCAGGGTCCGAGGTCAGAGCCACCTGGGCAATTTTTTTTTTTTATGGCA  |
| >hsa-miR-451a MIMAT0001631    | AAACCGUUACCAUACUGAGUU   | CCGGGAAACCGTTACCATTAC  | GTGCAGGGTCCGAGGTCAGAGCCACCTGGGCAATTTTTTTTTTTTAACTCA  |
| >hsa-miR-1246 MIMAT0005898    | AAUGGAUUUUUGGAGCAGG     | CCGGGAATGGATTTTGGGA    | GTGCAGGGTCCGAGGTCAGAGCCACCTGGGCAATTTTTTTTTTTTCTGCT   |
| >hsa-miR-451a MIMAT0001631    | AAACCGUUACCAUACUGAGUU   | CCGGGAAACCGTTACCATTAC  | GTGCAGGGTCCGAGGTCAGAGCCACCTGGGCAATTTTTTTTTTTTAACTCA  |
| >hsa-miR-19a-3p MIMAT0000073  | UGUGCAAAUCUAUGCAAACUGA  | TCGGTGTGCAAATCTATGCAA  | GTGCAGGGTCCGAGGTCAGAGCCACCTGGGCAATTTTTTTTTTTTCACTTT  |
| >hsa-miR-21-5p MIMAT0000076   | UAGCUUAUCAGACUGAUGUUGA  | TTCGGTAGCTTATCAGACTGA  | GTGCAGGGTCCGAGGTCAGAGCCACCTGGGCAATTTTTTTTTTTTCAACAT  |
| >hsa-miR-204-5p MIMAT0000265  | UUCCUUUGUCAUCCUAGCCU    | TCGGTTCCTTTGTCATCCT    | GTGCAGGGTCCGAGGTCAGAGCCACCTGGGCAATTTTTTTTTTTTAGGCAT  |
| >hsa-miR-138-5p MIMAT0000430  | AGCUGGUGUUGUGAAUCAGGCCG | CCGGGAGCTGGTGTGTGAATC  | GTGCAGGGTCCGAGGTCAGAGCCACCTGGGCAATTTTTTTTTTTTCCGCCT  |
| >hsa-miR-367-3p MIMAT0000719  | AAUUGCACUUUAGCAAUGGUGA  | CCGGGAATTGCACTTAGCAA   | GTGCAGGGTCCGAGGTCAGAGCCACCTGGGCAATTTTTTTTTTTTACCAT   |
| >hsa-miR-27b-3p MIMAT0000419  | UUCACAGUGGCUAAGUUCUGC   | TTCGGTTCACAGTGGCTAAG   | GTGCAGGGTCCGAGGTCAGAGCCACCTGGGCAATTTTTTTTTTTTGCAGAA  |
| >hsa-miR-302b-3p MIMAT0000715 | UAAGUGCUUCCAUGUUUAGUAG  | TCGGTAAGTGCTTCCATGTTT  | GTGCAGGGTCCGAGGTCAGAGCCACCTGGGCAATTTTTTTTTTTTCTACTA  |
| >hsa-miR-145-5p MIMAT0000437  | GUCCAGUUUCCCAGGAAUCCCU  | CCGGGTCCAGTTTTCCAGGA   | GTGCAGGGTCCGAGGTCAGAGCCACCTGGGCAATTTTTTTTTTTTAGGGAT  |
| >hsa-miR-20a-5p MIMAT0000075  | UAAAGUGCUUUAUGUGCAGGUAG | TCGGTAAAGTGCTTATAGTGC  | GTGCAGGGTCCGAGGTCAGAGCCACCTGGGCAATTTTTTTTTTTTCTACCT  |
| >hsa-miR-34a-5p MIMAT0000255  | UGGCAGUGUCUUAGCUGGUUGU  | CCGGGTGGCAGTGTCTTAGCT  | GTGCAGGGTCCGAGGTCAGAGCCACCTGGGCAATTTTTTTTTTTTACAACC  |
| >hsa-miR-328-3p MIMAT0000752  | CUGGCCUCUCUGCCUUCGCU    | CCGGGTGGCCCTCTTGCC     | GTGCAGGGTCCGAGGTCAGAGCCACCTGGGCAATTTTTTTTTTTTACGGAA  |
| >hsa-miR-126-3p MIMAT0000445  | UCGUACCGUGAGUAAUAAUGCG  | GCGGGCGTACCGTGAGTAAT   | GTGCAGGGTCCGAGGTCAGAGCCACCTGGGCAATTTTTTTTTTTTTCGCATT |
| >hsa-miR-424-5p MIMAT0001341  | CAGCAGCAAUCAUGUUUUGAA   | GCCCCAGCAGCAATTCATGT   | GTGCAGGGTCCGAGGTCAGAGCCACCTGGGCAATTTTTTTTTTTTCAAAC   |
| >hsa-miR-503-5p MIMAT0002874  | UAGCAGCGGGAACAGUUCUGCAG | CCGGGTAGCAGCGGGAACAGTT | GTGCAGGGTCCGAGGTCAGAGCCACCTGGGCAATTTTTTTTTTTTCTGCAG  |
| >hsa-miR-124-3p MIMAT0000422  | UAAGGCACGCGUGAAUGCC     | CCGGGTAAGGCACGCGGTG    | GTGCAGGGTCCGAGGTCAGAGCCACCTGGGCAATTTTTTTTTTTTGGCATT  |
| >hsa-miR-9-5p MIMAT0000441    | UCUUUGGUUAUCUAGCUGUAUGA | TCGGTCTTTGGTTATCTAGCT  | GTGCAGGGTCCGAGGTCAGAGCCACCTGGGCAATTTTTTTTTTTTCATACA  |
| >hsa-miR-223-3p MIMAT0000280  | UGUCAGUUUGUCAAUACCCCA   | CACGGTGTGCTTGTCAAAT    | GTGCAGGGTCCGAGGTCAGAGCCACCTGGGCAATTTTTTTTTTTTGGGGTA  |
| >hsa-miR-103a-3p MIMAT0000101 | AGCAGCAUUGUACAGGGCUAUGA | GGAGCAGCATTGTACAGGG    | GTGCAGGGTCCGAGGTCAGAGCCACCTGGGCAATTTTTTTTTTTTCATAGC  |
| >hsa-miR-92a-3p MIMAT0000092  | UAUUGCACUUGUCCCGCCUGU   | TTCGGTATTGCACTTGTCCC   | GTGCAGGGTCCGAGGTCAGAGCCACCTGGGCAATTTTTTTTTTTTACAGGC  |
| >hsa-miR-16-5p MIMAT0000069   | UAGCAGCACGUAAAUUUGGCG   | TTCGGTAGCAGCACGTAATA   | GTGCAGGGTCCGAGGTCAGAGCCACCTGGGCAATTTTTTTTTTTTCGCCAA  |
| >hsa-miR-210-3p MIMAT0000267  | CUGUGCGUGUGACAGCGGCUA   | CCGGGTGTGCGTGTGACAGC   | GTGCAGGGTCCGAGGTCAGAGCCACCTGGGCAATTTTTTTTTTTTACGCC   |

| miRNA                       | Sequence (5'-3')                                                                      | Forward primer         | RT primer                                          |
|-----------------------------|---------------------------------------------------------------------------------------|------------------------|----------------------------------------------------|
| >cel-miR-54-5p MIMAT0020773 | AGGAUAUGAGACGACGAGAACA                                                                | TCGGAGGATATGAGACGACG   | GTGCAGGGTCCGAGGTCAGAGCCACCTGGGCAATTTTTTTTTTTGTTCTC |
| SNORD-44                    | CCTGGATGATGATAAGCAAATGCTGAC<br>TGAACATGAAGGTCTTAATTAGCTCTAA<br>CTGACT                 | TGGCCTGGATGATGATAAGCA  | GTGCAGGGTCCGAGGTCAGAGCCACCTGGGCAATTTTTTTTTTTAGTCAG |
| SNORD-47                    | AACCAATGATGTAATGATTCTGCCAAAT<br>GAAATATAATGATATCACTGTAAAACC<br>GTTCCATTTTGATTCTGAGGTT | CGCCAATGATGTAATGATTCTG | GTGCAGGGTCCGAGGTCAGAGCCACCTGGGCAATTTTTTTTTTTAACCTC |
| Universal reverse primer    | CAGTGCAGGGTCCGAGGT                                                                    |                        |                                                    |
| Universal Taqman probe      | 56-FAM/CAGAGCCAC/ZEN/CTGGGCAATTT/3IABkFQ                                              |                        |                                                    |

**Supplemental file 2** A list of 31 miRNAs possibly related to pulmonary arterial hypertension (PAH).

| MicroRNA                                                | Function                                                                                                                                                      | Up or down-regulated | Reference |
|---------------------------------------------------------|---------------------------------------------------------------------------------------------------------------------------------------------------------------|----------------------|-----------|
| miR-150                                                 | miR-150 levels correlate with 2-year survival in patients with PAH.                                                                                           | ↓                    |           |
| miR-23b, miR-130a, miR-191, miR-30b, miR-133b, miR-208b |                                                                                                                                                               | ↑                    | 24        |
| miR-1, miR-26a, miR-29c, miR-34b, miR-451a, miR-1246    |                                                                                                                                                               | ↓                    | 24        |
| miR-451a                                                |                                                                                                                                                               | ↑                    | 35        |
| miR-19a                                                 | miR-19a mediates the suppressive effect of laminar flow on cyclin D1 expression in human umbilical vein endothelial cells.                                    |                      | 36        |
| miR-21                                                  | Targets PPAR $\alpha$ ; increases the proliferation and migration of PASMC.                                                                                   | ↑                    | 37        |
| miR-204                                                 | Targets SHP2; down-regulation of miR-204 activates NFAT. NFAT and SHP2 increase proliferation and resist apoptosis of PASMC.                                  | ↓                    | 32        |
| miR-138                                                 | Target Mst1; disrupt the Bcl-2 signaling pathway and negatively regulate PASMC apoptosis.                                                                     |                      | 38        |
| miR-367, miR-27b, miR-302b                              |                                                                                                                                                               | ↑                    | 32        |
| miR-145                                                 | Targets KLF5 gene and its downstream signaling molecule, myocardin.                                                                                           | ↓                    | 39        |
| miR-20a                                                 | Targets the PRKG1; promotes the proliferation and migration of PASMC, but inhibits the differentiation.                                                       | ↑                    | 30        |
| miR-34a                                                 | The p53 gene deficiency in mice is associated with lower levels miR-34a and hypoxia-induced PH and vascular remodeling.                                       | ↓                    | 40        |
| miR-328                                                 | Inhibits L-type calcium channel- $\alpha$ 1C suppresses the insulin growth factor 1 receptor, leading to apoptosis of pulmonary arterial smooth muscle cells. | ↓                    | 41        |
| miR-126                                                 |                                                                                                                                                               | ↑                    | 42        |
| miR-424, miR-503                                        | Targets FGF2 and FGFR1; induces the proliferation of PASCs.                                                                                                   | ↓                    | 43        |
| miR-124                                                 | Inhibits NFAT pathway through targeting NFATc1 gene and two regulators, CAMTA1 and PTBP1.                                                                     | ↓                    | 44        |
| miR-9                                                   | Increased NFAT activation by targeting KPNB1 and DYRK1B.                                                                                                      |                      | 31        |
| miR-223                                                 | Contributes to PARP-1/STAT3 activation and thus to PAH development                                                                                            | ↓                    | 45        |
